# Psychiatric Services

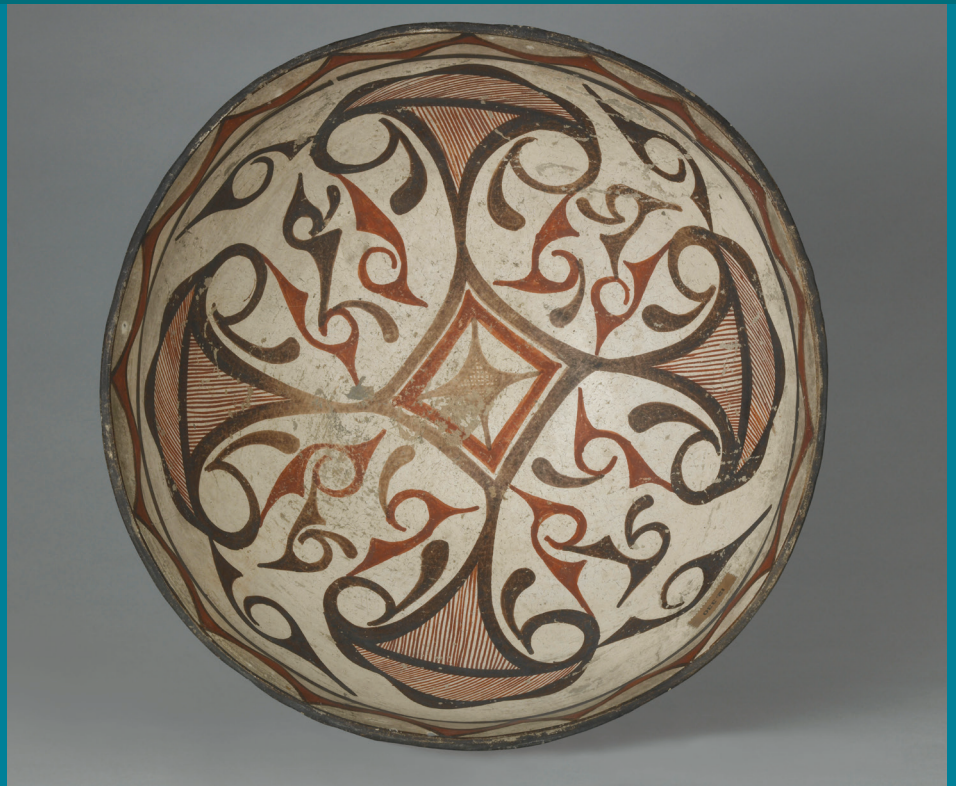

Predictors of mental health service use by young adults: a literature review

A learning behavioral health care system: opportunities to enhance research

Training ACT teams in New York State with face-to-face and online learning

ACA's dependent coverage expansion and out-of-pocket spending by young adults
